# Supplementary material
Source: publisher figshare collection journal article supplement (https://frontiersin.figshare.com/ndownloader/files/12109511)
Supplement: Supplementary file [file 12109511]

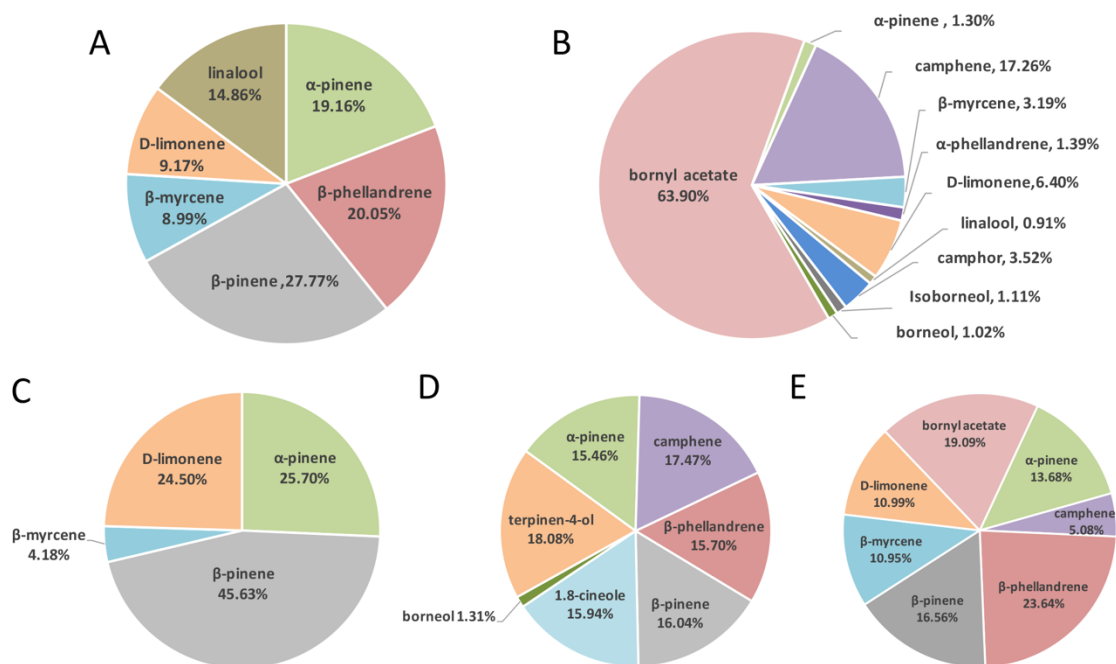

Supplementary Figure 1. Percentage of monoterpenes in different tissues of *A. villosum*. (A) Pericarp of 45-DAF fruit. (B) Seeds of 45-DAF fruit. (C) Leaf. (D) Root. (E) Creeping stem.

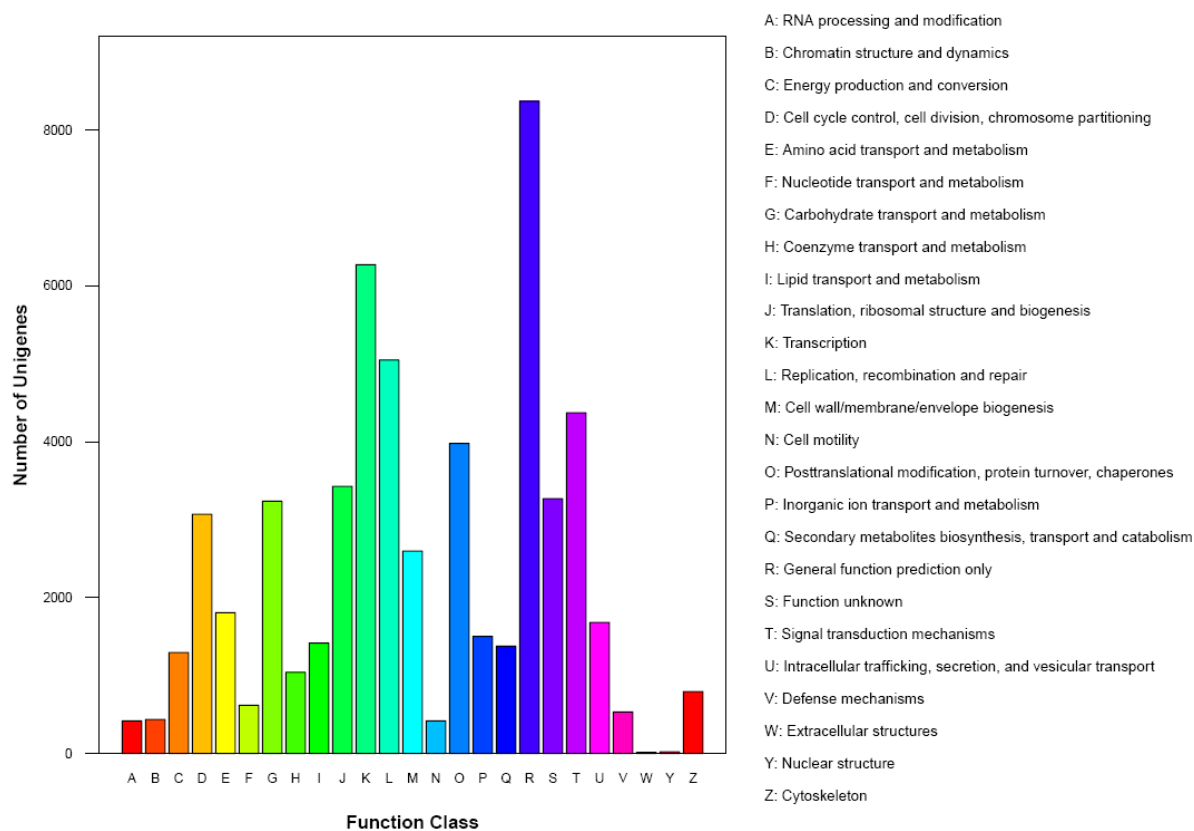

Supplementary Figure 2. COG function classification of *Amomum villosum* unigenes

|        | N-terminal transit peptide                                                                                                  | RRX <sub>8</sub> W |     |
|--------|-----------------------------------------------------------------------------------------------------------------------------|--------------------|-----|
| AvTPS3 | .MAT...RQVTSIYAFPM SVLP RR...PMI VTAVEHRGRTFRRTLQVRSCIATSNVAP...LFRSGNYGPONI VTD ERVQS L T STST...EOREKRERRNNVMEQTRN        |                    | 97  |
| AvTPS1 | .....NSVLSASAATFGS RAG...IGGSGSRSAAI KRRRRLPRI QCHAAEESQSLSTTSFRSGNYGPSI VTHDRI QSLT L SHA. ADEEDHAEIKL LKYQTSK             |                    | 99  |
| HcTPS7 | .....NSVLSFAASATFGF RGG...LGG.FSRPAAI KQWRCLPRI QCHSAEQSQSP...LFRSGNYGPSI VTHDRI QSLT L SHT...ADEDDHGERIKL LKQTNK           |                    | 93  |
| HcTPS8 | .....NSLLAPP SYFPFRG...LRRSTAAKQPCCRL VKCTADROSP EA...AFRSAHYCPNMSSDDYI QSLTVESPLKVEEKEQTKKLM LKRI AE                       |                    | 88  |
| ZmM1   | .....NSLFHPALAPL NAFDRR...LFVLRRCATTVKQ...RCLTLI RCAAADAGKTPA...SFRSANYCPNL VGDRI RSLTVE...EEDHTATARI KL LKVKRK             |                    | 90  |
| LaBPP5 | MTAARSFNAI NSNMTDHLHKFGKKNLEFGGYS CNNASPNRL RPCCSKLSTNAESQLDST...FRSGMYKPTL VDFDRI QSLN. SVY...TEEKYSTACDIL QQVKKL          |                    | 104 |
| EILMS  | MSAT...LI MHEAI PNKPI KSLSSKKSKFCFASYI PSANGLIKI EPCASIQENAQCQDSPTVD...FRSGNYEPPL VDFDFVQS L TAKY...AEERYSKRANEIK QVKKMM    |                    | 103 |
| AvTPS3 | LI L EQQ. QVAEQLRIIDH LQQLGVAYHF KDEI SDVLSRLHASIDGVS...SLEDDHAT ALUFRLLURANGFSVS QDL FETFRDEK. GNF. EVRCEDDI RGLLSI YEAS   |                    | 201 |
| AvTPS1 | LNEEKGVRVEQLQI IDH LQQLGVAYHF KDEI KDTLRGFHAS FEDVS...LQLRDNLHASALUFRLLURENGFSVSEDI FKKFKDEKAGGF. EDRLQSQAEG. LLSI YEAS     |                    | 205 |
| HcTPS7 | LNEEKGVEGQLQI IDH LQQLGVAYHF KDEI KDTLRGFYAS FEDI S...LQFKDNLHASALUFRLLURENGFSVSEDI FKKFKDDQKGGF. EDRLQSQAEG. LLSI YEAS     |                    | 199 |
| HcTPS8 | VI CEGK. EVEEQLRIIDH LQQLGVAYHF KDEI KASLRNI HSSLEESI STI I FKDKNLHASALUFRLLURENGFSVSEDI FEEFRDEKGGYFRS DGLKNQTDQAMLSI YEAS |                    | 197 |
| ZmM1   | VI HDDK. EVEEQLRIIDH LQQLGVAYHF KDEI KDSLSLHASLEDTS...LKLKDNLHASALUFRLLURENGFSVSEDI FYKFRDEN. GGF. RDCLGKNTQGLLSI YEAS      |                    | 194 |
| LaBPP5 | LEESDMFR...QLQI IDH LQQLGVAYHF KDEI NLI NTI YFEKKFCEK...EMDLYSTS LAFRLURQGLKVSQEVDFDCRKEE. GGF. EARLGDETNG. LLECEASE        |                    | 204 |
| EILMS  | LVGEIQI MEPI HQELI IDHLSIGI SYHFDEI DVI LNSVYHQI FNGNDKYHQRD YSTS LGERLLURQGFVSQGV DGGKNEK. GEF. KESLGDDTKG. LLSI YEAS      |                    | 210 |
| AvTPS3 | LEKEGEI LKEAMDFATDKL KGFMEEGSGS...LGL...REQVAHALQPLI NWRMERVQHRMFI EACN...GADDAI NPLLEFAKL DYNL VODMYKSEL REISSVWSGLG       |                    | 303 |
| AvTPS1 | LEKDGEEL LHEAREFTTI KHLKNLIEEGS...LKPGLI REQVAHALQPLI NWRFORHTKVFIFAVQR...D...PAMDPALEGLAKLDFNALQNI YKRELKEASRWMDLG         |                    | 308 |
| HcTPS7 | LEKDGEEL LHEAREFTTI KHLKNLIEEGS...LKPGLI REQVAHALQPLI NRRFORHTKVFIFAVQR...D...PTMDPALEGLAKLDFNALQNI YKRELKEASRWMDLG         |                    | 302 |
| HcTPS8 | YEKDGEMVLQEAECTIKHLENLIEEGSD...LK...LKEQAAHALQPLI NWRMERI HARVFI EACQR...EVVVI DNPALLEFAKLDFNAQSI YKRELKASRWMDLG            |                    | 300 |
| ZmM1   | YEKDGEMVLHEAMEFATEHLKNVIEEGMAS...MDLT...REKVAHALQPLI NWRMERI HTRVFI ESCQR...EATNVNQALIEFAKLDFNATQSVHKRELREVSRWMDLG          |                    | 298 |
| LaBPP5 | LATEGEETLELRLFTTNI LQKKDDERNELL MDYLRTL RHSLDPLIYWRVORPSARMFIEAYAT...RS...DMNPI MLEFAKLDFNI VQATHOEL KQVSRWVKESR            |                    | 310 |
| EILMS  | LNTGEGTKLELREYSLSLHKLDERI DD...NDDDVVLVM RRALEPLVHMRI ORPNARMI EEYSNERRSI MKNPI LLEFAKLDFNI VQATHOEL KHVSWWEQTG             |                    | 318 |
|        | RXR                                                                                                                         | DDXXD              |     |
| AvTPS3 | LLEKLPFFRDRLI AENYLVAAGFAVETDSWRCRM OTKI I CLVTIM DDIDYVYGTIL DELELFTI DVVDRMDLTAMDKLPEYMKLSFFALENMVHEEGYRVMKEKGLDI VPDL    |                    | 413 |
| AvTPS1 | LPQKLPFFRDRLI TENYLVTGWAFEPDSWAFREL OTKI NCFITIM DDIDYVYGTIL DELELFTI DIRMVDNSI DKLPEYMKI CFUAVENTVNDAGYEVIRDKGVDPYI        |                    | 418 |
| HcTPS7 | LPQKLPFFRDRLI TENYLVAWVFARFEDSWAFREMDTKNCFITIM DDIDYVYGTIL DELELFTI DIRMVDNAI DKLPEYMKI CFUAVENTVNDAGYEVIRDKGVDPYI          |                    | 412 |
| HcTPS8 | VVEKLPFFARDRLI TENYLVTGWAFEPHISFRDACTKGNCFVTIM DDIDYVYGTIL DELELFTI HVVDVDRMDNADQLDPEYMKI LEFALENTVNDAGYEVIRDKGVDPYI        |                    | 410 |
| ZmM1   | LAELKLPFFRDRLI TENYLVTGWAFEPHMRREVOITKVI CFVTIM DDIDYVYGTIL DELELFTI DIRMDLAANDKLPEYMKLOFFAI INLVHEEGYRVMKEKGLDI VPDL       |                    | 408 |
| LaBPP5 | LAELKLPFFARDRVENYLWNRGVLFPQYGYPI MNAKLFVLTIVDDIDYVYGTILEETOLFTNLI TRMDVEALGOLPEYMKI CYMAIDNNINELAYEVLKQGLLI QDL             |                    | 420 |
| EILMS  | LAKTIPFARDRLI VECYLVTIGGLEEGQYGYSPIMSKVNAFIVTIDIDYVYGTILEELLFNDVI QRMDEAVIDKLPHYWQNCFLALNNVDELAAYNLKQGLFI PHL               |                    | 428 |
|        | NSE/DTE                                                                                                                     |                    |     |
| AvTPS3 | KRI VGNCKSVLKEAKVYHHGQI PTLLEEVLENGYVSVTTPML LHALCAGDD. LTGEAL KSFSSYYAI TRSTGWLFRLYDDNGTSTDEIERGDVAKI QCVNHEKGVTEE         |                    | 522 |
| AvTPS1 | KRAMAELCKMYNRBAARYHAGVTPTLDEYLDGAWISISGALI LSTAYCMGND. LTKDDL DKFSTYPAPVWHPSCMLRLHDDFGTSTDEIARGDVQKAVQCCMHERKVPEA           |                    | 527 |
| HcTPS7 | KRAMAELCKMYNRBAARYHTGYTPTLDEYLDGAWISISGALI LSTAYCMGKD. LTKEDL DKFSTYPSI VQPSCLRLHDDFGTSTDEIARGDVQKAVQCCMHERKVPEA            |                    | 521 |
| HcTPS8 | KRSWADLCKAYLVBAKYHRYKPTINBYLDNTWISISGPAI FTNAYCMANN. LTKDGLERFSEYPAL AKHSSMLGRILYDGLATSTAEIERGDVPKSI QCCMHERGVSEG           |                    | 519 |
| ZmM1   | KKSVGDCKSVYFEAKVYHHGQI PKLKEVYENGLVSI AGRI LSHAYCVAND. LTGEAL KI FPSYHEI TRSSS LERLYDDNGTSTDEIERGDVPKIVQCVNHEKGVSEE         |                    | 517 |
| LaBPP5 | RKFVADLCVAYGKBAEYVYTYGKPTLEEVLEVAWSISAHLI LGYMFLTSNPI EKEASQSLSNYHNI IRNSANVLRALADDLGTSPYEMORGDVPKAVGYNNENGASTE             |                    | 530 |
| EILMS  | RKSWANLCKAYLVQBAKYVSKGYTPTLEEVINNAWISISARVMSHEYFLVANPI DNEAVQSI YEYHNI VRCSANVLRSLNDLGTSPDEIMKRGDVPKSVQCVNHEKGVTEE          |                    | 538 |
| AvTPS3 | AARKEMTELNRKYVRELNGFLSV. DSPVEEYLNVAI NIPRTAQFFVYFGDG/GWVVDRET KSI I SLELEPI QI...                                          |                    | 596 |
| AvTPS1 | VAREHI IQVNEAKVRLNNGNRVA. TSSFEYFLNVAI NIPRSAQFFYGGDG/GSGDGS. ETKKQVI SLLI EPVQF...                                         |                    | 600 |
| HcTPS7 | VAREHI KQVNEAKVRLNNGNRVA. ASSFEYFQNVAI NLPRAAQFFYGGDG/GANADG. ETQKQVNSLLI EPVQF...                                          |                    | 593 |
| HcTPS8 | VAREQVKELI RGNVRCNNGDRAA. ASSFEEMKTVAVDI ARASQFFYHNGDKYKAGDG. ETMTQVMSLLI NPI I...                                          |                    | 591 |
| ZmM1   | VARETRELNRKCVRELNASLSV. DSPLEEYI NNI QVNI PRTAQFFYQDG/GKAYG. ETRSKI I LLELEPI QI...                                         |                    | 590 |
| LaBPP5 | EAREYVKHLIREVWKTETNGERFK. ESPFTPSNRI CADLGRMAQFMYQHDG/GI RNL. QVEDRI QSLI FEPI V...                                         |                    | 602 |
| EILMS  | DAQTYI RTVI YETWKKNEERVAADSLFKDFVRSVVDLGRMAQFMYQHDG/GI HFP. EMVDRI SLELEFEFSVDM                                             |                    | 614 |

Supplementary Figure 3. Protein alignment of AvTPS1 and AvTPS3 with *Hedychium coronarium* TPS7 (AHJ57305.1), TPS8 (AGY49283.1), *Zingiber montanum* monoterpene synthase (AHI46572.1) and *Lavandula angustifolia* bornyl diphosphate synthase (AJW68082.1) and *Erythranthe lewisii* limonene/myrcene synthase (AHI50308.2). The predicted transit peptides of AvTPS1 and AvTPS3 were showed with red frame. The conserved domains RRX<sub>8</sub>W, RXR, DDXXD and NSE/DTE were showed with black frame.

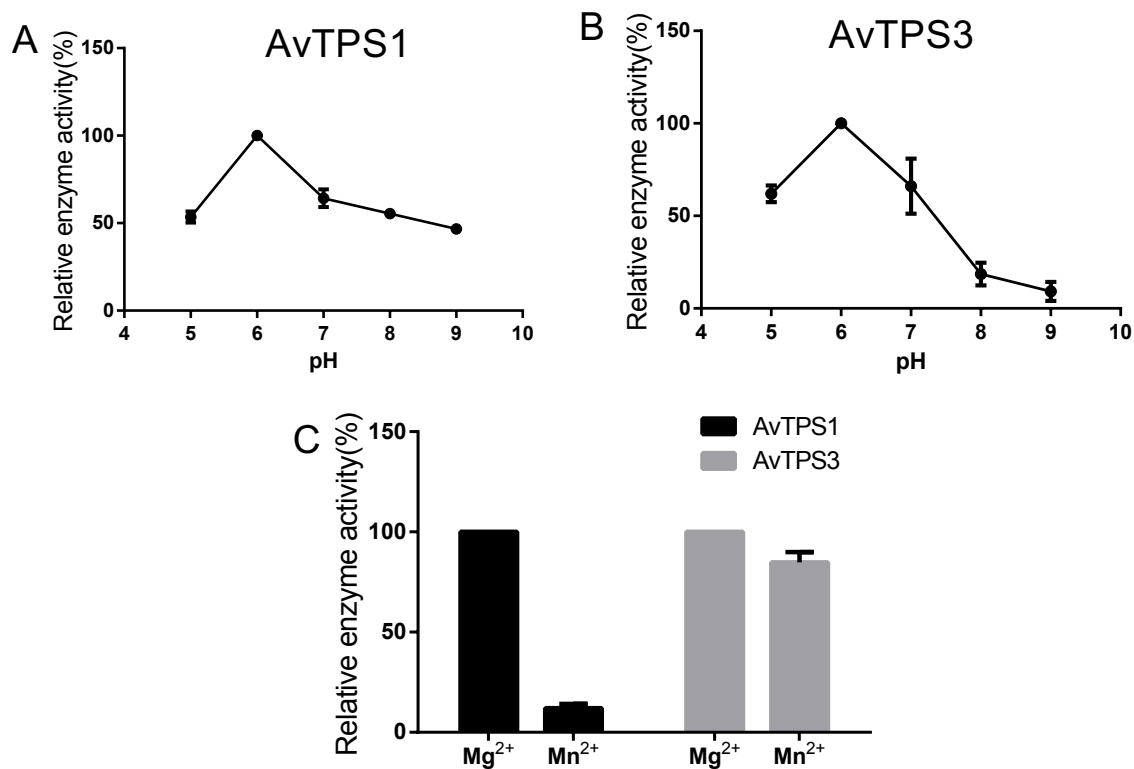

Supplementary Figure 4. The analysis of optimum pH and metal ion in AvTPS1 and AvTPS3. (A) pH analysis of AvTPS1. (B) pH analysis of AvTPS3. (C) Metal ion analysis of AvTPS1 and AvTPS3.

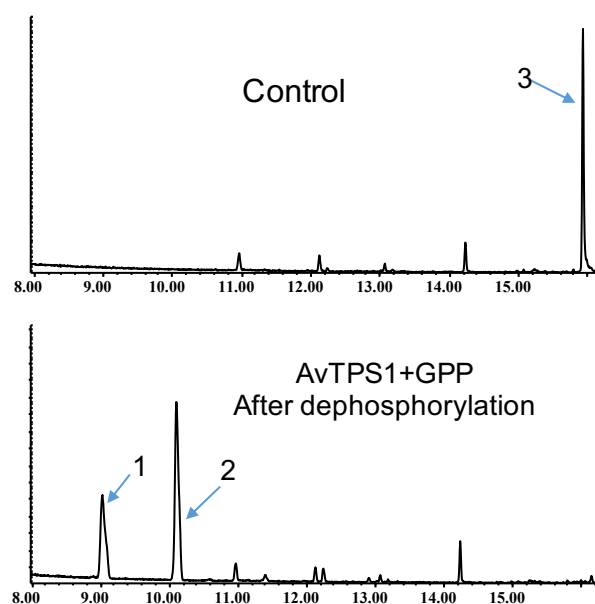

Supplementary Figure 5. The GC-MS chromatogram of the monoterpene products generated by AvTPS1 protein after dephosphorylation. The compounds of peaks: 1,  $\alpha$ -pinene. 2,  $\beta$ -pinene. 3. geraniol.

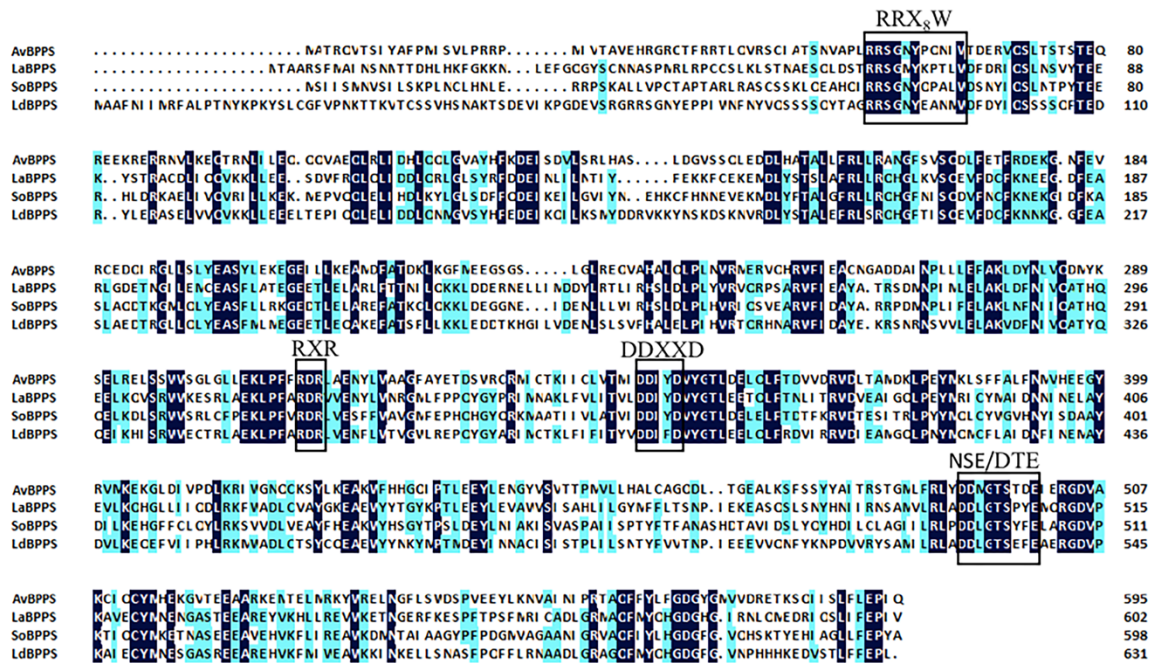

Supplementary Figure 6. Protein alignment of AvBPPS with bornyl diphosphate synthases from *Lavandula angustifolia* (LaBPPS, AJW68082), *Salvia officinalis* (SoBPPS, AF051900) and *Lippia dulcis* (LdBPPS, ATY48638). The conserved domains RRX<sub>8</sub>W, RXR, DDXXD and NSE/DTE were showed with frame.
